# Supplementary material
Source: PubMed Central journal article supplement (PMC10991456)
Supplement: 262_2020_2657_MOESM1_ESM.pdf [file 262_2020_2657_MOESM1_ESM.pdf]

**Supplementary Figure S1. Schematic summary of methods for tumor-infiltrating immune cells quantification**  
 (a) Whole-slide-based computational analysis of CD3<sup>+</sup> and CD8<sup>+</sup> tumor-infiltrating lymphocytes (TILs) densities in invasive margin (IM) and center of tumor (CT) areas. (b) Tissue microarray (TMA)-based computational analysis of densities of FoxP3<sup>+</sup> TILs, CD68<sup>+</sup> and CD163<sup>+</sup> tumor-infiltrating macrophages, and CD177<sup>+</sup> tumor-infiltrating neutrophils in IM and CT areas. In total, four cores (two IM and two CT cores) per case were evaluated.

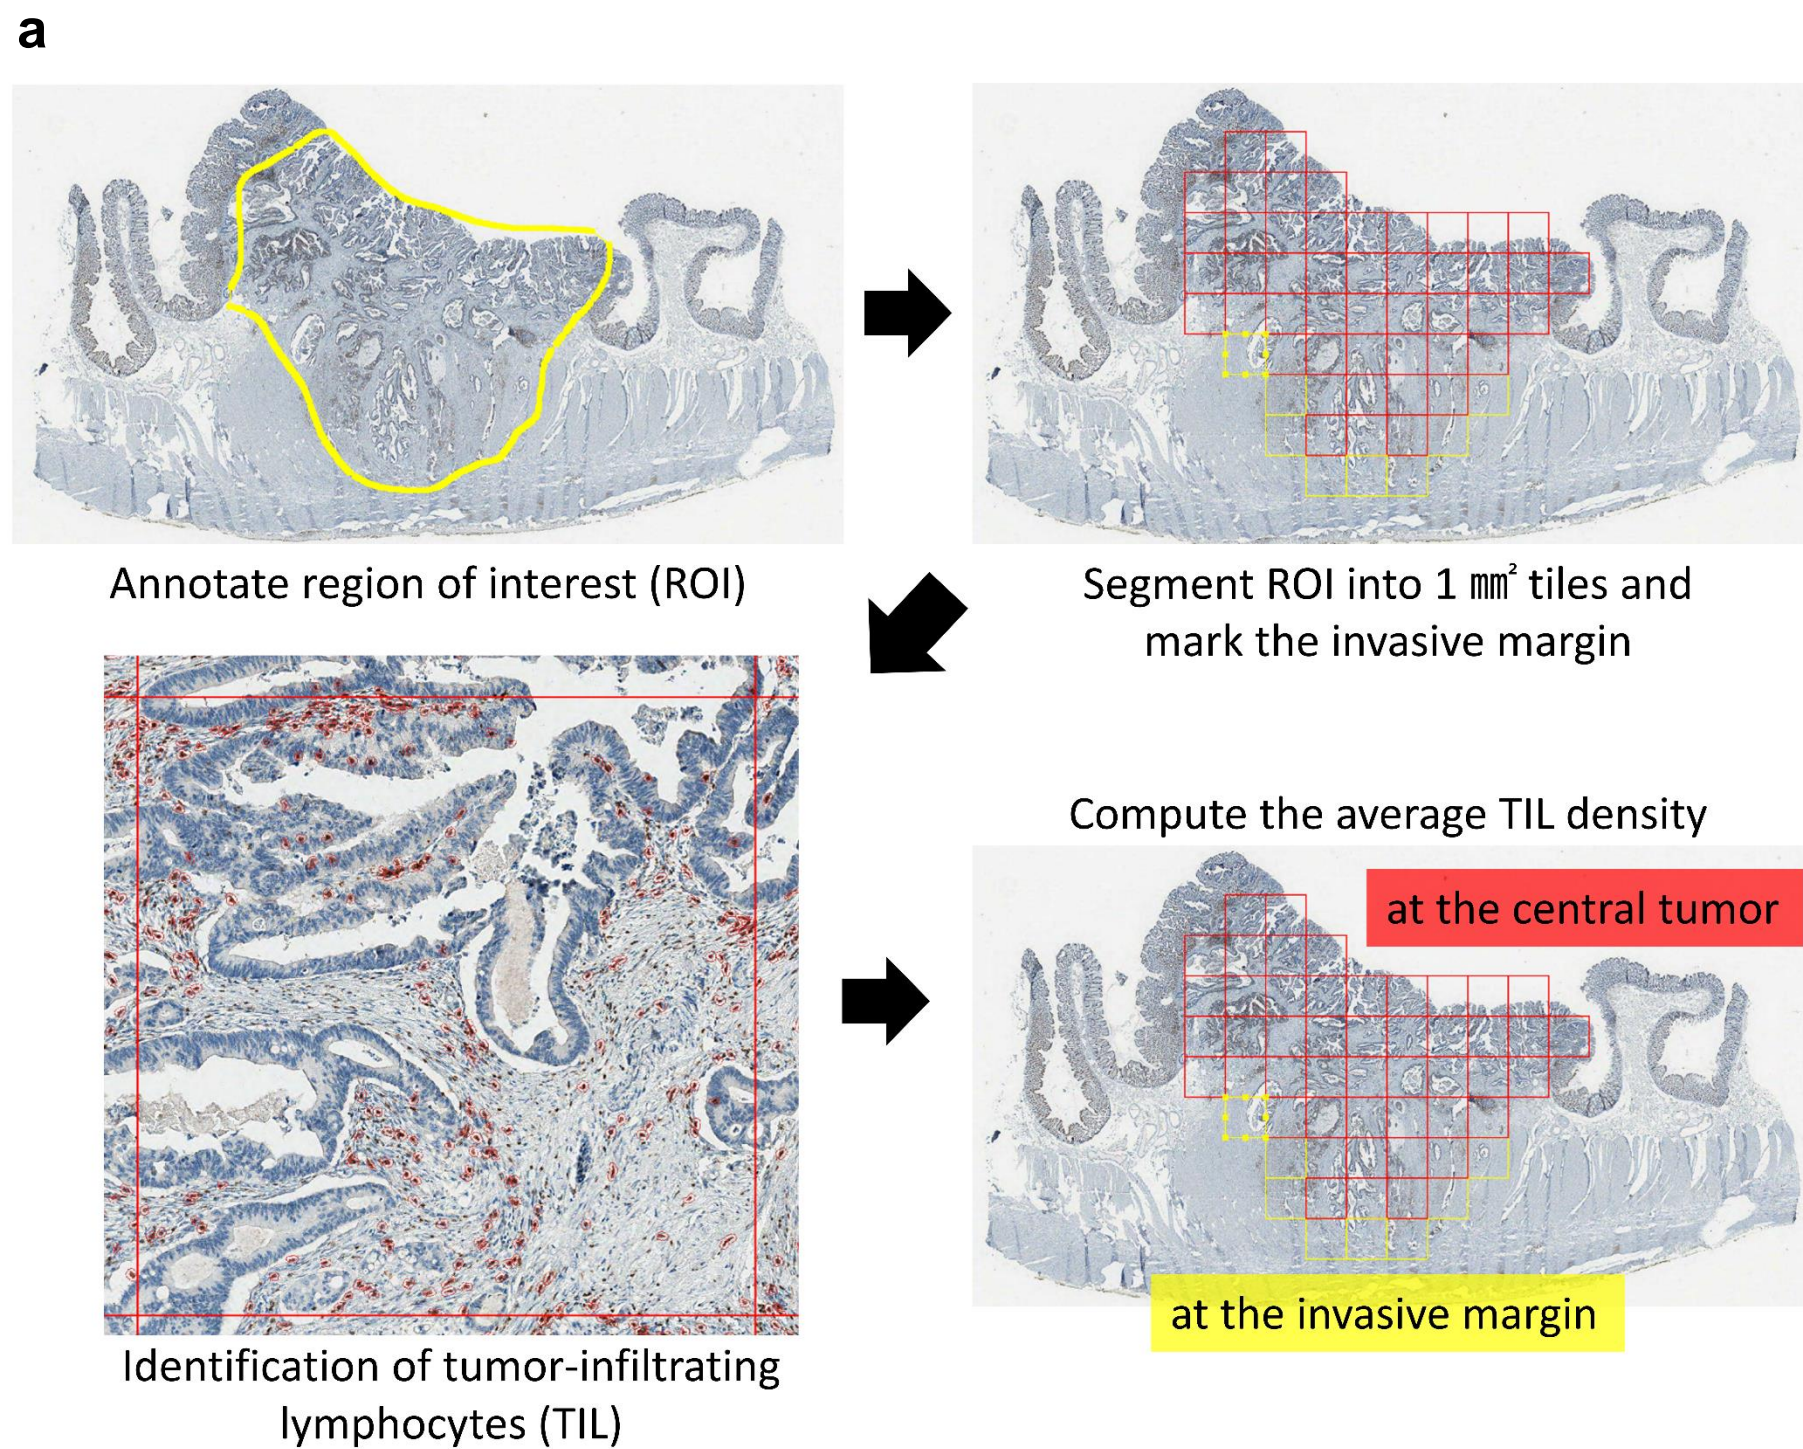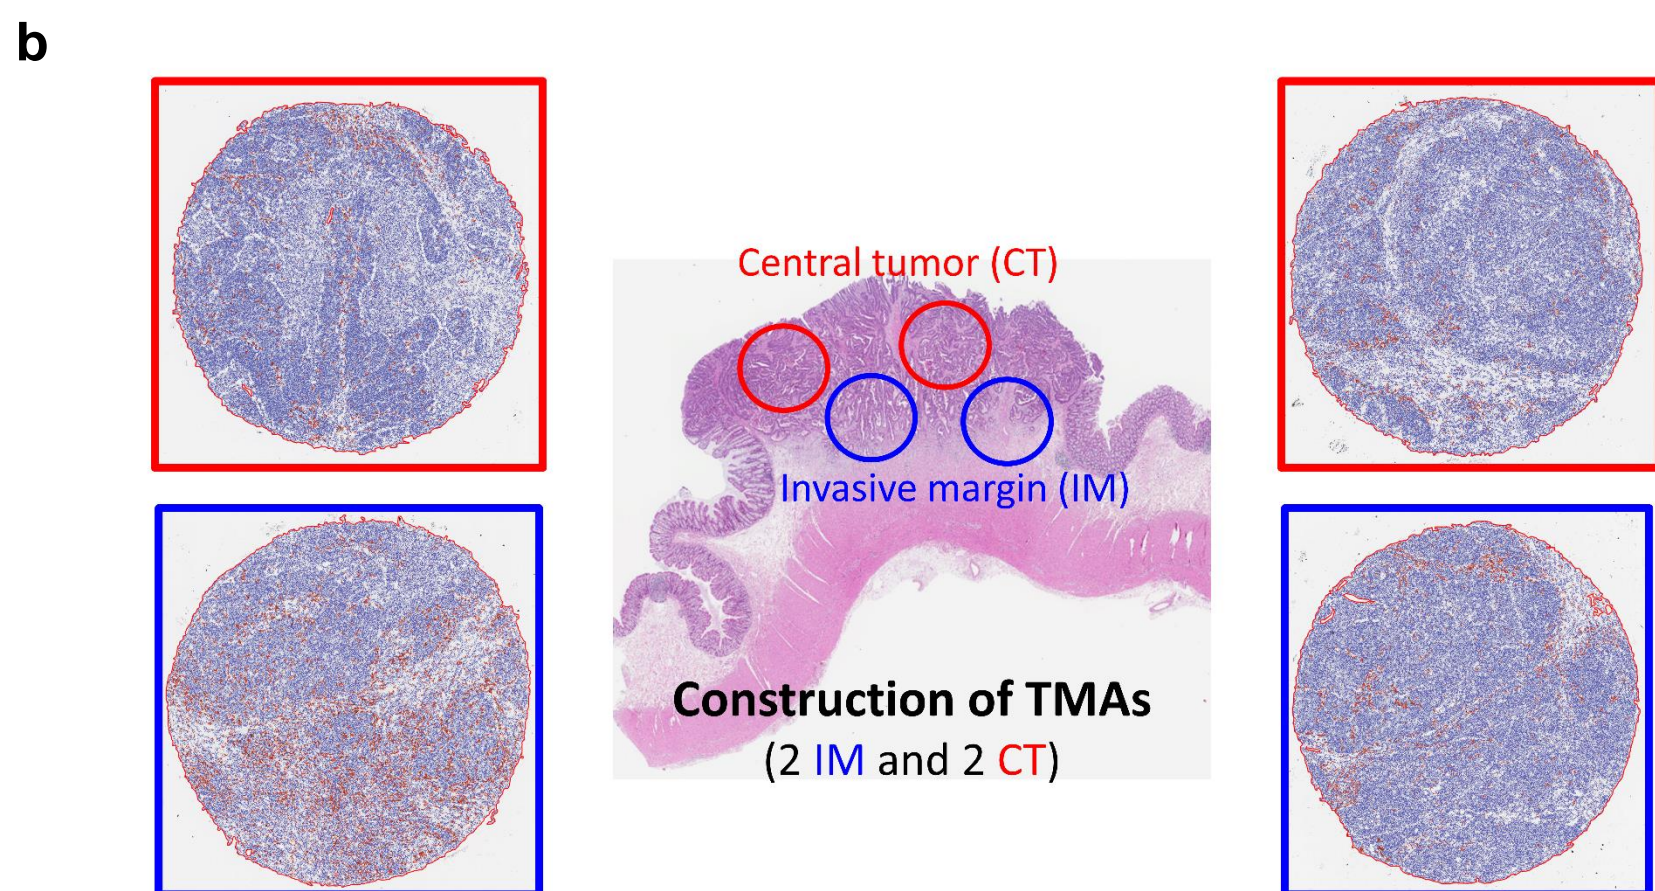

|                                                           | IM1       | IM2 | CT1       | CT2 |
|-----------------------------------------------------------|-----------|-----|-----------|-----|
| <b>Density</b><br>(# positive cells/<br>area of TMA core) | A         | B   | X         | Y   |
|                                                           | <b>IM</b> |     | <b>CT</b> |     |
| <b>Average</b>                                            | (A+B)/2   |     | (X+Y)/2   |     |
