# Supplementary material
Source: PubMed Central journal article supplement (PMC10991456)

### Supplementary Figure S3. Correlation analyses between tumor-infiltrating immune cell densities and intratumoral *Fn* loads in MSI-high CRCs

(a) There were no significant correlations between CD3<sup>+</sup> T cell densities in IM (upper)/CT (lower) areas and *Fn* loads in MSI-high CRCs. (b) There were no significant correlations between CD8<sup>+</sup> T cell densities in IM/CT areas and *Fn* loads in MSI-high CRCs. (c) There were no significant correlations between CD4<sup>+</sup> T cell densities in IM/CT areas and *Fn* loads in MSI-high CRCs. (d) There were no significant correlations between CD68<sup>+</sup> macrophage densities in IM/CT areas and *Fn* loads in MSI-high CRCs. (e) There were no significant correlations between CD163<sup>+</sup> macrophage densities in IM/CT areas and *Fn* loads in MSI-high CRCs. (f) There were no significant correlations between CD177<sup>+</sup> neutrophil densities in IM/CT areas and *Fn* loads in MSI-high CRCs.

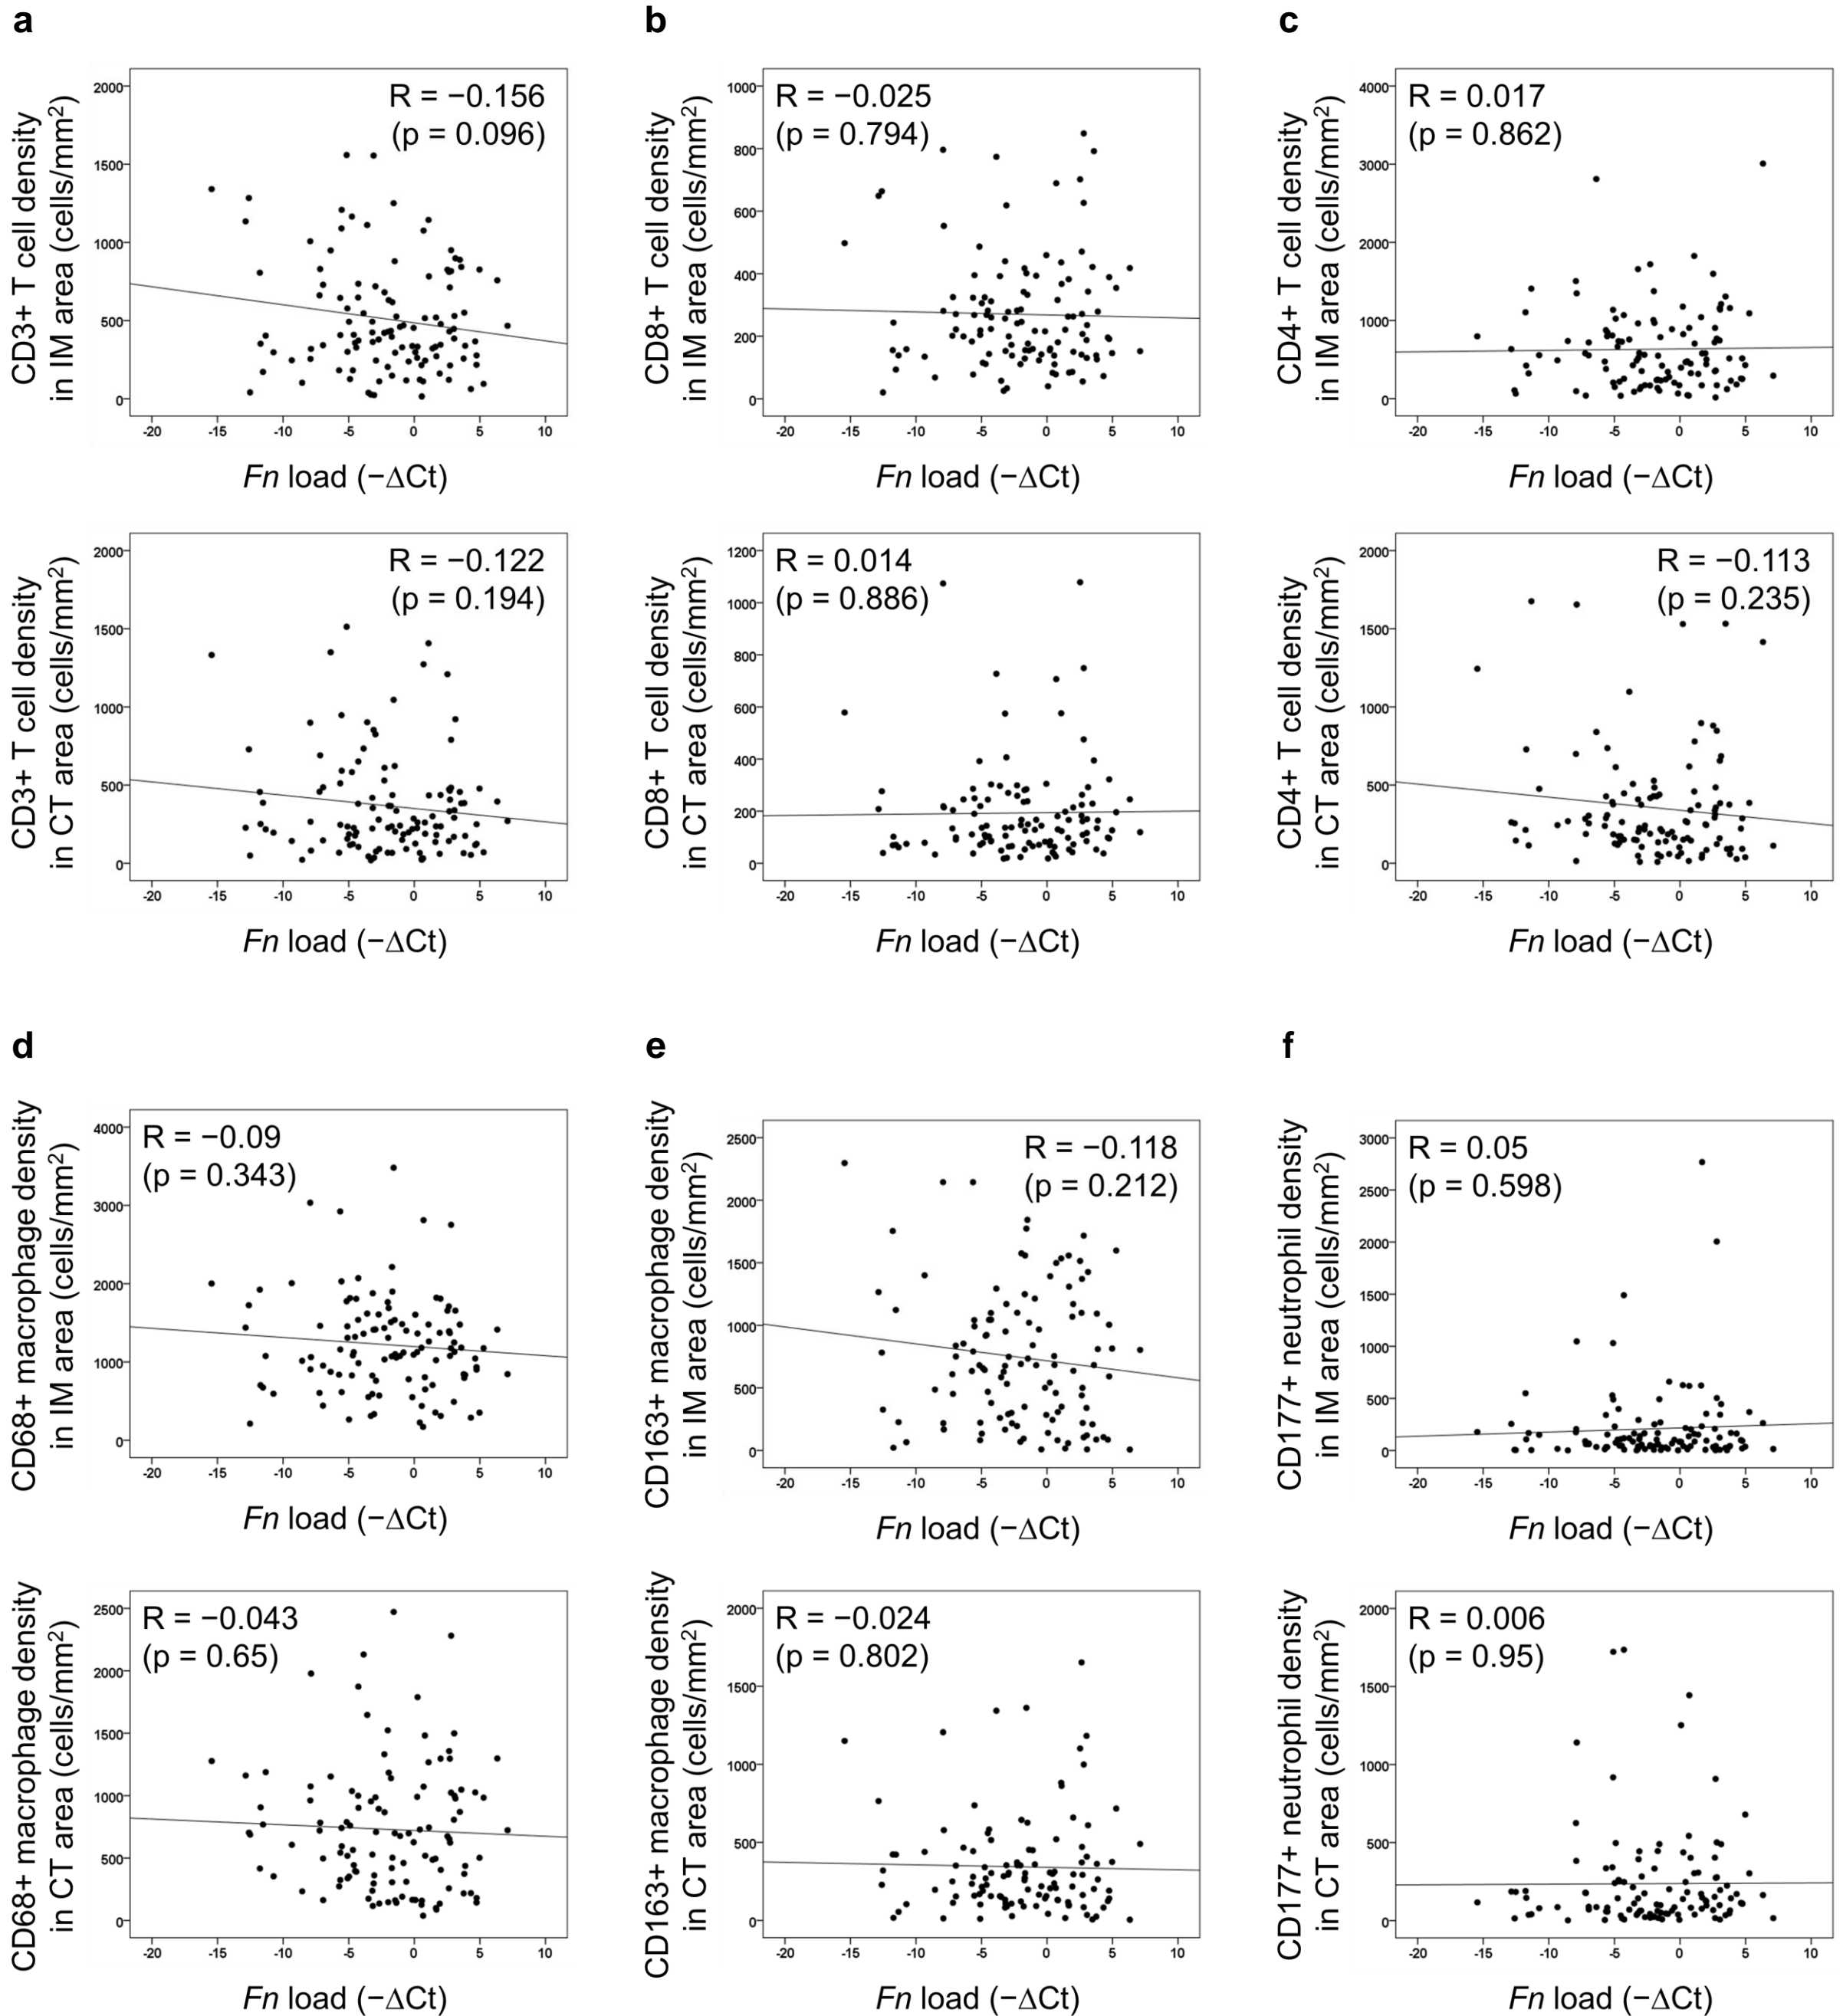

Supplement: 262_2020_2657_MOESM3_ESM.pdf [file 262_2020_2657_MOESM3_ESM.pdf]
