# Supplementary material
Source: PubMed Central journal article supplement (PMC10991456)

**Supplementary Figure S4. Comparison of FoxP3<sup>+</sup> T cell density to CD3<sup>+</sup> T cell density ratio between *Fn*-high and *Fn*-low/negative MSI-high CRCs**

(a) There was a tendency toward lower FoxP3<sup>+</sup> T cell to CD3<sup>+</sup> T cell ratio at the invasive margin (IM) area in the *Fn*-high subgroup than in the *Fn*-low/negative subgroup, but statistical significance was not reached. (b) There was a tendency toward lower FoxP3<sup>+</sup> T cell to CD3<sup>+</sup> T cell ratio at the center of tumor (CT) area in *Fn*-high subgroup than in *Fn*-low/negative subgroup, but statistical significance was not reached.

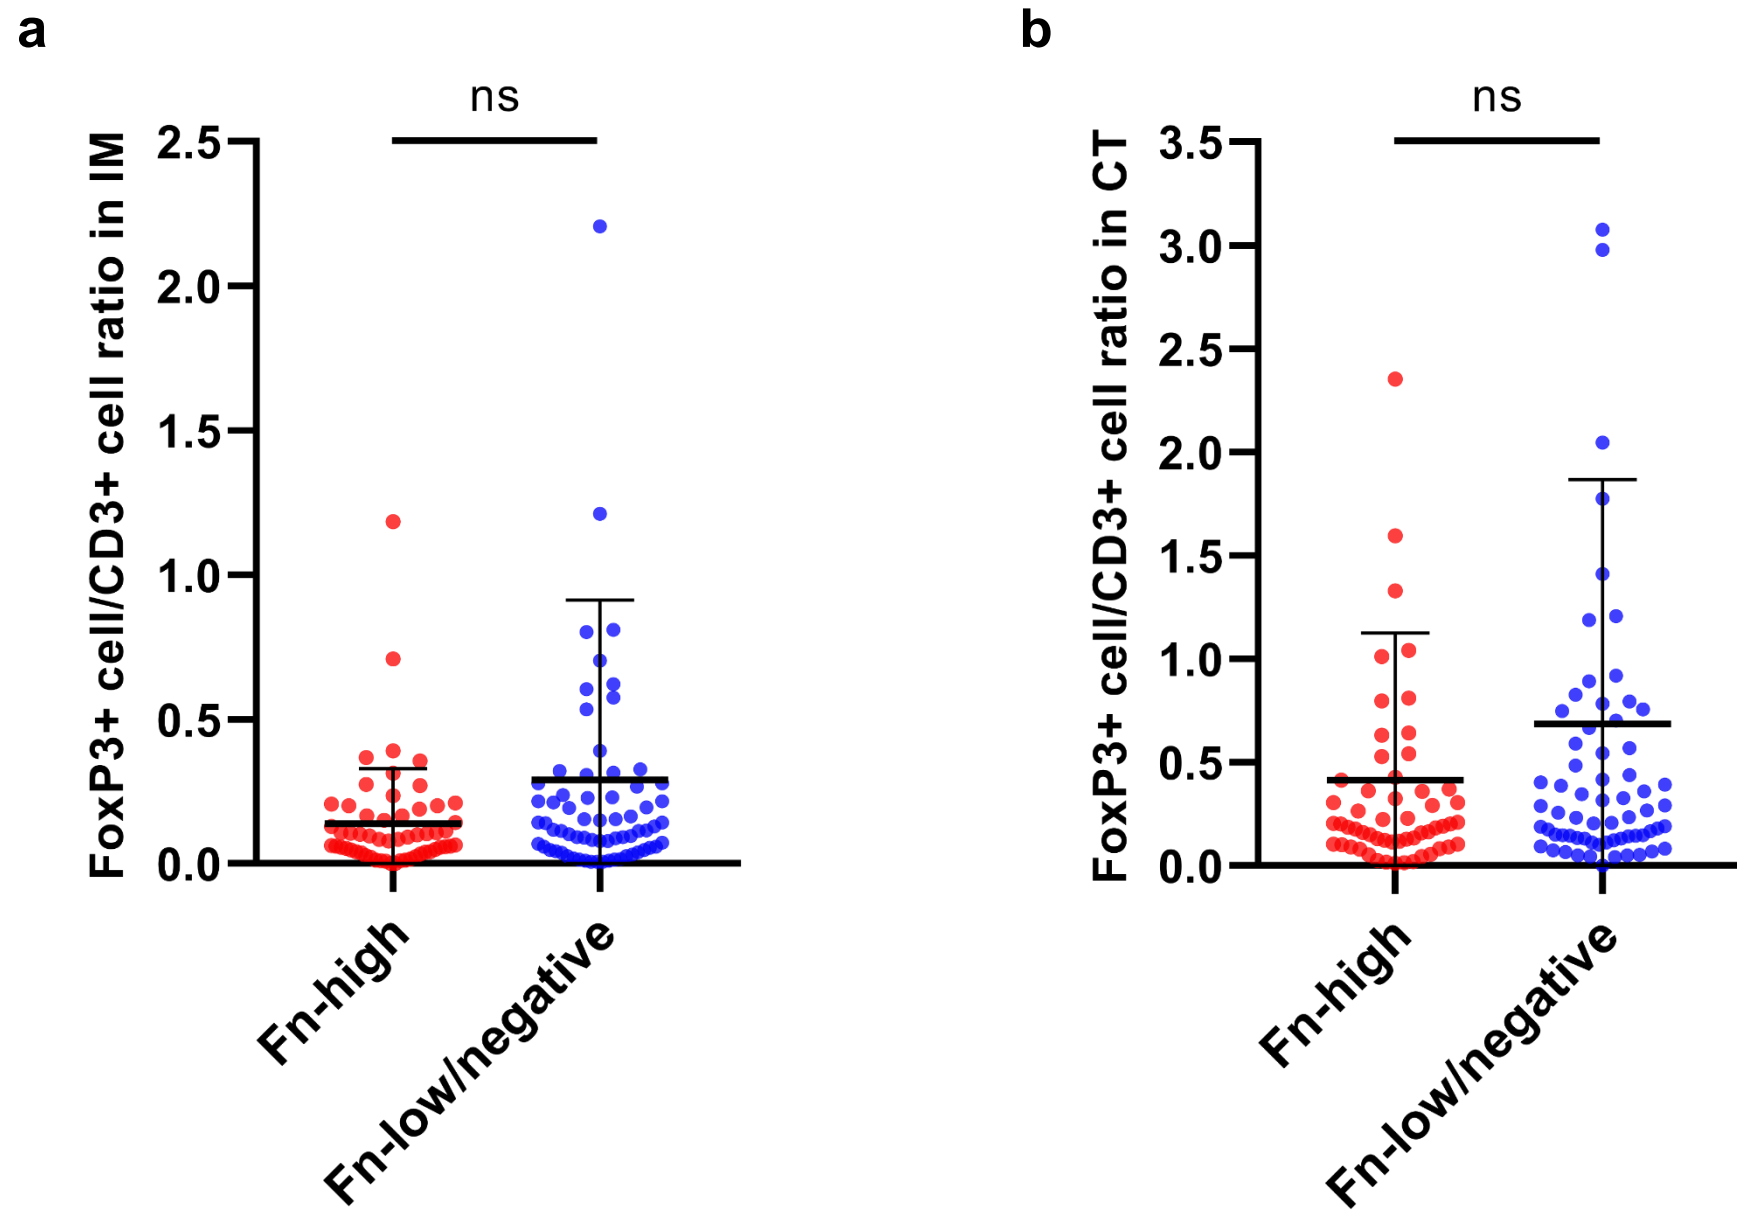

Supplement: 262_2020_2657_MOESM4_ESM.pdf [file 262_2020_2657_MOESM4_ESM.pdf]
