# Supplementary material
Source: PubMed Central journal article supplement (PMC10991456)

**Supplementary Figure S7. Comparison of *Fn* DNA loads between center of tumor (CT) and invasive margin (IM) areas of MSI-high CRCs**

(a) *Fn* loads of IM areas are significantly lower than those of matched CT areas in representative *Fn*-high tumors (n=10).

(b) *Fn* loads of IM areas are significantly lower than those of matched CT areas in representative *Fn*-low tumors (n=8).

(P-values are obtained from Wilcoxon matched-pairs signed rank test.)

**a**

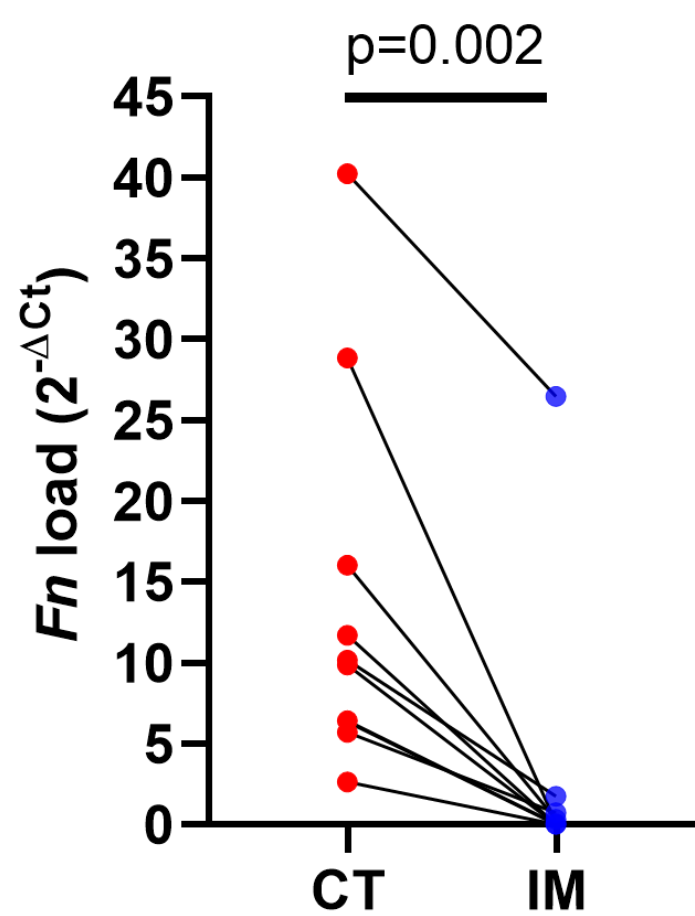

**b**

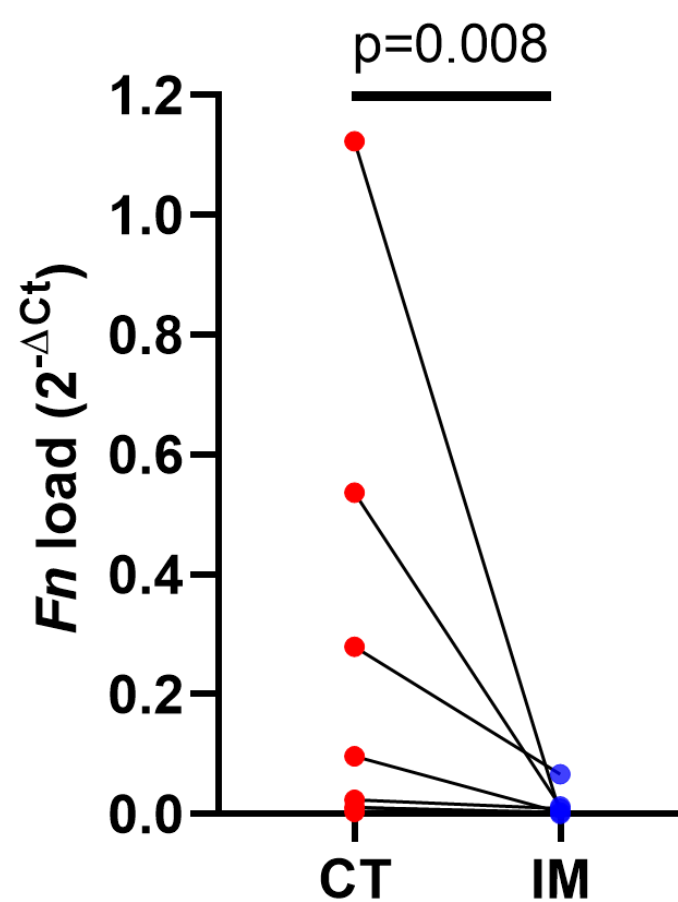

Supplement: 262_2020_2657_MOESM7_ESM.pdf [file 262_2020_2657_MOESM7_ESM.pdf]
