# Supplementary material
Source: PubMed Central journal article supplement (PMC10991456)
Supplement: 262_2020_2657_MOESM8_ESM.pdf [file 262_2020_2657_MOESM8_ESM.pdf]

**Supplementary Table S1.** Clinicopathologic and molecular features of MSI-high CRCs according to tumor-infiltrating FoxP3<sup>+</sup> T cell density

| Variable                             |                                               | FoxP3-high<br>(n = 40) | FoxP3-low (n<br>= 86) | P-value      |
|--------------------------------------|-----------------------------------------------|------------------------|-----------------------|--------------|
| <b>Tumor size</b>                    | Larger ( $\geq$ 6.3 cm)                       | 11 (27.5%)             | 43 (50.0%)            | <b>0.018</b> |
|                                      | Smaller (< 6.3 cm)                            | 29 (72.5%)             | 43 (50.0%)            |              |
| <b>AJCC/UICC cancer stage</b>        | Stage I/II                                    | 34 (85%)               | 56 (65%)              | <b>0.021</b> |
|                                      | Stage III/IV                                  | 6 (15%)                | 30 (35%)              |              |
| <b>Depth of invasion (pT)</b>        | Submucosa or proper muscle (pT1/pT2)          | 11 (27.5%)             | 7 (8.1%)              | <b>0.004</b> |
|                                      | Beyond the proper muscle (pT3/pT4)            | 29 (72.5%)             | 79 (91.9%)            |              |
| Lymph node metastasis (pN)           | Absent (pN0)                                  | 34 (85.0%)             | 59 (68.6%)            | 0.051        |
|                                      | Present (pN1/pN2)                             | 6 (15.0%)              | 27 (31.4%)            |              |
| <b>Distant metastasis (pM or cM)</b> | Absent (M0)                                   | 40 (100%)              | 76 (88.4%)            | <b>0.03</b>  |
|                                      | Present (M1)                                  | 0 (0%)                 | 10 (11.6%)            |              |
| Early recurrence <sup>a</sup>        | Absent                                        | 39 (97%)               | 78 (91%)              | 0.27         |
|                                      | Present                                       | 1 (3%)                 | 8 (9%)                |              |
| Lymphatic invasion                   | Absent                                        | 30 (75.0%)             | 58 (67.4%)            | 0.39         |
|                                      | Present                                       | 10 (25.0%)             | 28 (32.6%)            |              |
| Venous invasion                      | Absent                                        | 37 (92.5%)             | 72 (83.7%)            | 0.179        |
|                                      | Present                                       | 3 (7.5%)               | 14 (16.3%)            |              |
| Perineural invasion                  | Absent                                        | 33 (82.5%)             | 62 (72.1%)            | 0.207        |
|                                      | Present                                       | 7 (17.5%)              | 24 (27.9%)            |              |
| Tumor grade (differentiation)        | Low grade (well to moderately differentiated) | 28 (70.0%)             | 54 (62.8%)            | 0.429        |
|                                      | High grade (poorly differentiated)            | 12 (30.0%)             | 32 (37.2%)            |              |
| CIMP                                 | CIMP-high                                     | 15 (37.5%)             | 26 (30.2%)            | 0.418        |
|                                      | CIMP-low/negative                             | 25 (62.5%)             | 60 (69.8%)            |              |
| <i>KRAS</i> mutation                 | Absent                                        | 29 (72.5%)             | 53 (61.6%)            | 0.233        |
|                                      | Present                                       | 11 (27.5%)             | 33 (38.4%)            |              |
| <i>BRAF</i> mutation <sup>b</sup>    | Absent                                        | 35 (87.5%)             | 78 (92.9%)            | 0.331        |
|                                      | Present                                       | 5 (12.5%)              | 6 (7.1%)              |              |

Abbreviations: MSI-high, microsatellite instability-high; CRCs, colorectal cancers; AJCC/UICC, American Joint Committee on Cancer/Union for International Cancer Control; CIMP, CpG island methylator phenotype

<sup>a</sup>Early recurrence was defined as clinically found and/or pathologically confirmed tumor recurrence within two years after curative surgery.

<sup>b</sup>Two cases were excluded in *BRAF* mutation analysis results due to suboptimal quality or quantity of their isolated DNA samples.
